# Supplementary material for: Therapeutic potency of fermented field water-dropwort (Oenanthe javanica (Blume) DC.) in ethanol-induced liver injury
Source: Royal Society of Chemistry journal article supplement (doi:10.1039/c9ra08976d), 2020-01-01

## Supplementary Figure Legends

**Figure 1. The serum biochemistry in ethanol diet mice with various concentration of fermented field water-dropwort (FDE) administration.** Serum aspartate transaminase (AST) and alanine transaminase (ALT) levels of pair-fed mice and ethanol-fed mice with various concentration of FDE administration.  $n = 5$  per group; means  $\pm$  SD of the mean.  $**p < 0.01$  and  $***p < 0.001$ . n.s.: not significant.

Supplementary Figure 1

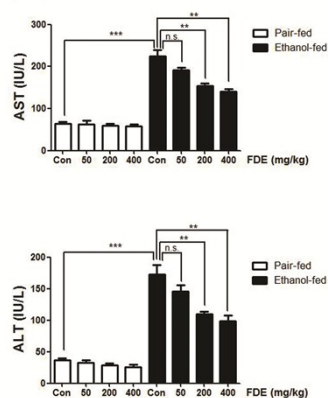

Supplement: c9ra08976d1.pdf [file c9ra08976d1.pdf]
