# Supplementary material for: Therapeutic potency of fermented field water-dropwort (Oenanthe javanica (Blume) DC.) in ethanol-induced liver injury
Source: Royal Society of Chemistry journal article supplement (doi:10.1039/c9ra08976d), 2020-01-01
Supplement: c9ra08976d2.xlsx [file c9ra08976d2.xlsx]

## Sheet: H2O2
	H2O2 (uM)
	Con-PF	FDE-PF	Con-EF	FDE-EF
	17.3904	18.2142	51.1057	23.0955
	15.0056	17.1374	41.1367	31.9586
	14.0174	14.8984	38.5613	24.6481
	12.5508	11.6942	74.9113	24.5731
	12.5782	11.7748	73.2619	24.8723
	7.65951	6.86693	47.8664	14.9715
	14.9541	14.7023	85.0115	30.3026
	11.126	10.4384	66.876	21.5705
	10.9167	11.102	64.9856	21.9574
	16.0876	15.9428	87.9779	32.5612
	8.61228	7.88985	54.6797	16.5231
	13.4713	14.3914	76.5543	27.3417
	12.2024	12.4617	71.8707	24.4418
	5.82758	4.94286	43.4893	11.0295
	4.0522	2.4807	37.1797	6.05241
	5.52489	2.83337	46.4741	8.18415
	8.01907	8.35557	48.3318	16.1928
	9.74058	9.37861	60.2272	19.1273
	7.86091	7.46081	50.0636	15.4631

## Sheet: GSHGSSG
	Total GSH					GSSG					GSH					GSH/GSSG
	Con-PF	FDE-PF	Con-EF	FDE-EF		Con-PF	FDE-PF	Con-EF	FDE-EF		Con-PF	FDE-PF	Con-EF	FDE-EF		Con-PF	FDE-PF	Con-EF	FDE-EF
	5.3733	5.46537	4.08119	5.13237		0.825805	0.825805	1.17213	0.953164		4.5475	4.63956	2.90906	4.1792		5.50674	5.61823	2.48185	4.38456
	6.76722	5.6031	4.27508	4.6031		1.05483	0.892277	1.31569	1.01519		5.71239	4.71082	2.95939	3.58791		5.41548	5.27955	2.24931	3.53422
	5.52646	6.72425	4.65695	4.72425		0.815192	1.05483	1.43411	1.12191		4.71127	5.66943	3.22284	3.60234		5.77934	5.37474	2.24728	3.21091
	5.13342	5.80076	4.01928	4.83291		1.00578	1.01096	1.8334	1.13583		4.12765	4.7898	2.18588	3.69708		4.10393	4.73786	1.19225	3.25496
	5.73193	6.16346	3.87876	4.77286		0.985388	0.992376	1.84599	1.21788		4.74654	5.17109	2.03277	3.55498		4.81693	5.21081	1.10118	2.919
	6.30146	5.92937	3.74908	4.69438		1.02972	0.962434	1.7894	1.21896		5.27175	4.96693	1.95968	3.47541		5.1196	5.1608	1.09516	2.85112
	6.30997	5.90214	4.18132	5.17724		1.02838	0.963914	1.75074	1.22461		5.28159	4.93823	2.43058	3.95263		5.13584	5.1231	1.38832	3.22767
	5.84708	6.06002	4.11466	5.33629		1.00668	0.983457	1.80269	1.38982		4.8404	5.07656	2.31197	3.94647		4.80828	5.16195	1.28251	2.83955
	5.67612	6.14425	4.0569	4.89372		0.973863	0.979653	1.80721	1.15744		4.70226	5.1646	2.24969	3.73628		4.82846	5.27186	1.24484	3.22806
	5.52857	6.09785	4.41931	5.09255		1.05579	1.00905	1.82882	1.17877		4.47278	5.08881	2.5905	3.91379		4.23645	5.04317	1.41649	3.32023
	5.72062	6.03056	4.62325	5.61823		1.04088	1.01219	1.77669	1.13385		4.67973	5.01837	2.84656	4.48438		4.49593	4.95791	1.60217	3.95499
	5.74508	6.05569	4.20628	4.15352		0.997758	0.968047	1.76935	1.17015		4.74733	5.08764	2.43693	2.98337		4.75799	5.25558	1.3773	2.54955
	5.75536	6.27834	4.15378	5.43862		0.9971	0.958527	1.77313	1.13947		4.75826	5.31981	2.38065	4.29915		4.7721	5.54999	1.34263	3.77295
	5.76565	6.06615	4.0643	5.38315		1.01214	0.983788	1.80767	1.13852		4.75351	5.08236	2.25663	4.24462		4.6965	5.16612	1.24836	3.72818
	5.6932	5.82527	4.00372	5.60993		1.01692	0.996529	1.81264	1.13427		4.67628	4.82874	2.19108	4.47566		4.59848	4.84556	1.20878	3.94585
	5.86566	5.82771	4.76834	4.97188		0.963236	0.923722	1.5107	1.21232		4.90243	4.90399	3.25765	3.75956		5.08954	5.30894	2.15638	3.10112
	6.47284	5.92549	4.50386	4.71519		0.970326	0.905771	1.51554	1.22147		5.50251	5.01972	2.98832	3.49372		5.67078	5.54193	1.97179	2.86027
	5.83909	6.42736	4.15819	5.05607		0.968232	0.895133	1.44657	1.49088		4.87086	5.53223	2.71161	3.56519		5.03067	6.18034	1.87451	2.39133
	6.12746	6.22649	3.83925	4.40899		0.96358	0.896205	1.46635	1.45149		5.16388	5.33028	2.3729	2.95749		5.35906	5.94762	1.61824	2.03755
	5.81737	6.21821	3.78032	5.39165		0.926972	0.863172	1.47082	1.38887		4.8904	5.35504	2.3095	4.00278		5.27568	6.20391	1.5702	2.88204

## Sheet: MDA
	MDA (uM)
	Con-PF	FDE-PF	Con-EF	FDE-EF
	3.40574	3.77496	23.8608	4.36573
	4.95649	3.3319	19.2824	5.03033
	4.29188	4.29188	18.6178	4.21804
	4.36573	4.58726	33.6083	5.91647
	3.84881	4.73495	33.9776	3.47959
	1.19039	2.5196	33.1653	9.60872
	2.15037	2.15037	31.6884	12.1195
	2.81498	1.55962	32.5745	12.341
	2.96267	3.25805	28.513	11.6764
	2.07653	4.36573	27.2577	11.0118
	4.36573	4.73495	24.3039	13.2271
	4.14419	4.36573	25.0423	17.2886
	3.84881	2.15037	23.5654	15.0732
	4.36573	1.48577	27.9961	16.9194
	4.51341	5.32571	29.473	10.9379
	4.07035	5.84262	31.393	16.624
	3.9965	4.36573	32.2053	12.7102

## Sheet: ALT and AST
	ALT					AST
	Con-PF	FDE-PF	Con-EF	FDE-EF		Con-PF	FDE-PF	Con-EF	FDE-EF
	34	20	170	120		58	37	282	175
	30	30	192	110		67	69	215	147
	42	42	124	116		58	58	228	82
	44	32	135	85		60	87	190	153
	19	11	122	97		77	62	207	148
	18	11	218	115		19	41	275	135
	21	26	111	75		18	31	203	128
	19	44	225	108		21	26	187	181
	30	70	147	131		19	44	190	113
	20	19	185	67		30	70	215	128
	30	66	154	108		20	19	273	148
	13	17	221	102		30	66	215	135
	30	46	178	95		45	55	315	135
	22	25	167	115		30	46	175	144
	22	34	159	123		22	25	220	95
	14	14	108	78		22	34	247	171
	20	23	215	105		55	48	186	130
	39	37	194	110		47	23	245	100
	16	12	176	65		39	37	192	143
	38	42	155	107		48	25	203	109

## Sheet: serum TG
	serum TG
	Con-PF	FDE-PF	Con-EF	FDE-EF
	36.5	30.5	196	69
	38.5	30	70	62.5
	24	23.5	172	72
	39	13	152	56
	15	19	71.5	31
	21	32	215	95
	35	35	187	48
	17	30	95	76
	19	18	135	61
	28	16	170	58
	27	25	200	31
	19	20	165	77
	35	31	150	81
	30	18	125	48
	24	22	118	92
	18	29	137	57
	19	24	168	51
	25	17	81	77
	34	31	207	45
	21	15	171	91

## Sheet: Liver TG
	Liver TG
	Con-PF	FDE-PF	Con-EF	FDE-EF
	47	17	480	352
	59	52	410	205
	12	60	502	296
	25	56	547	126
	45	48	444	211
	18	22	548	185
	23	34	675	195
	45	29	451	312
	55	31	358	218
	32	44	372	179
	30	20	615	257
	28	31	524	192
	15	35	468	204
	33	17	376	208
	17	47	621	192
	51	42	495	275
	42	37	561	128
	31	25	527	298
	18	54	359	127
	22	28	428	164

## Sheet: Liver cholesterol
	Liver cholesterol
	Con-PF	FDE-PF	Con-EF	FDE-EF
	22	21	61	41
	24	17	67	32
	14	24	57	38
	7	24	87	21
	27.5	28.5	46	45
	28.5	18	91	38
	26	25	75	38
	24.5	32	51	31
	11	9	67	35
	18	11	61	28
	31	17	55	25
	21	19	49	32
	17	22	78	40
	9	25	70	32
	18	13	63	38
	21	19	52	25
	25	7	49	23
	15	11	55	41
	17	28	72	28
	11	20	80	33
